# Supplementary material for: Burden and unmet need for specialist care in poorly controlled and severe childhood asthma in a Danish nationwide cohort
Source: Springer Nature journal article supplement (doi:10.1186/s12931-023-02482-7), 2023-06-27
Supplement: MOESM2 [file 25542756]

### Ages 2-5

#### Boys

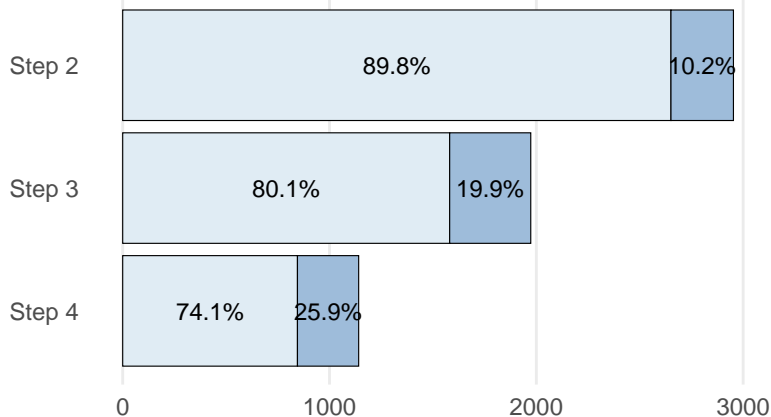

### Ages 2-5

#### Girls

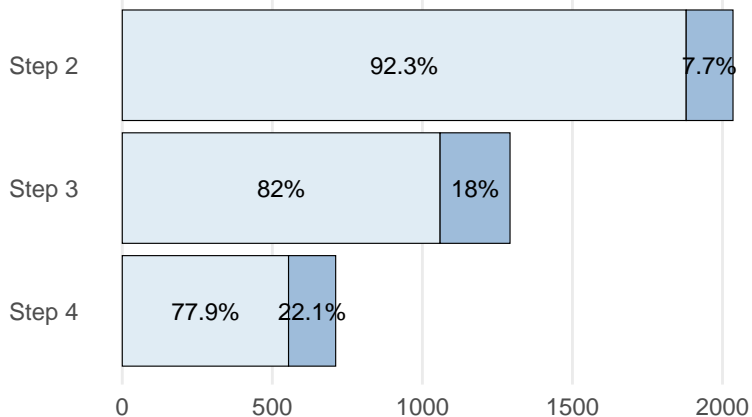

### Ages 6-11

#### Boys

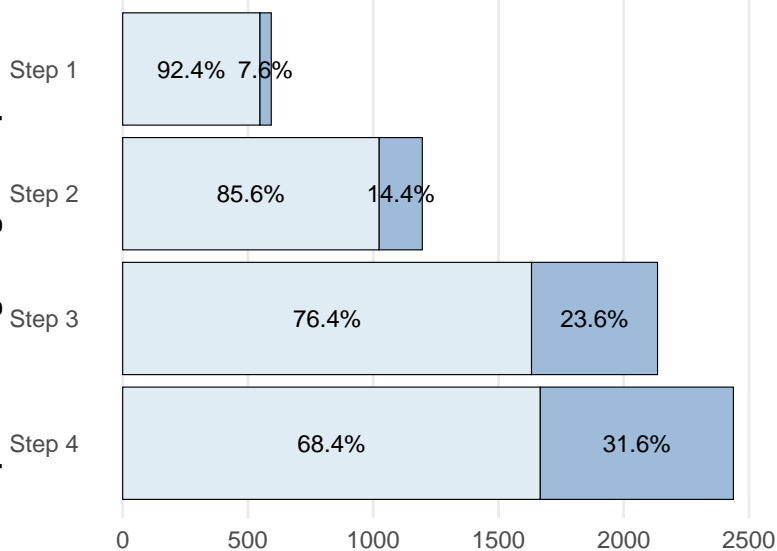

### Ages 6-11

#### Girls

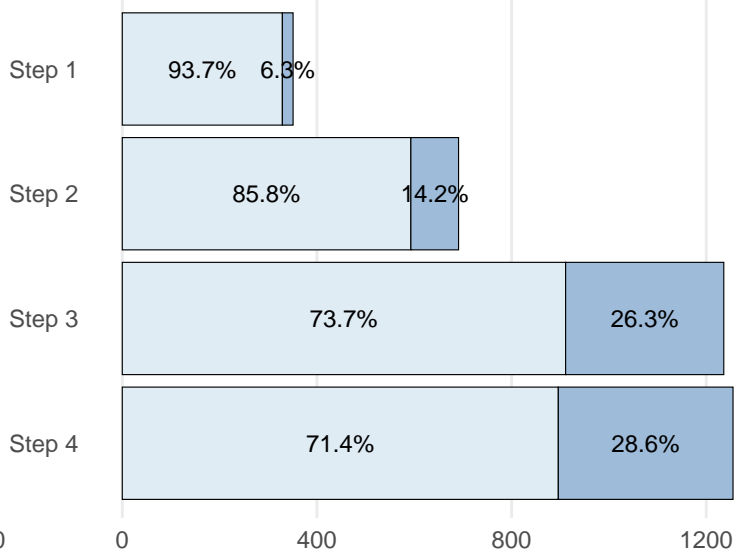

### Ages 12+

#### Boys

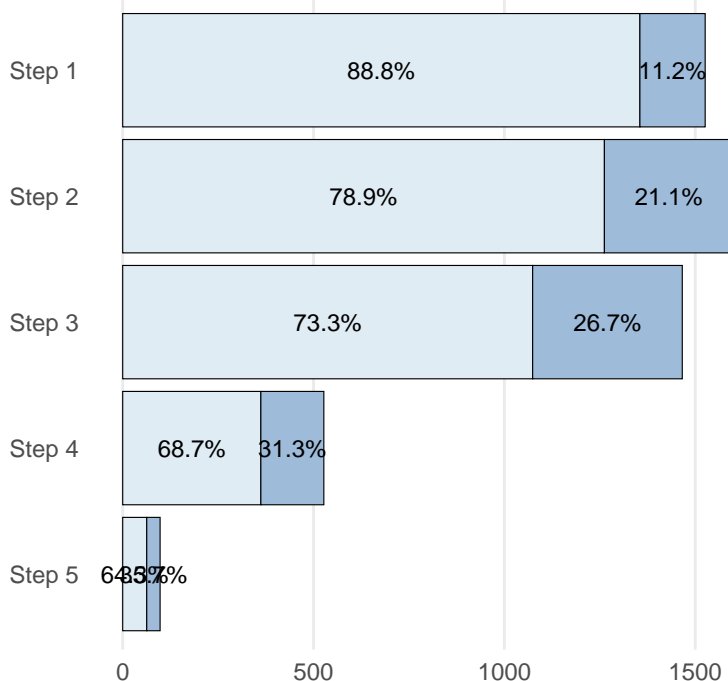

### Ages 12+

#### Girls

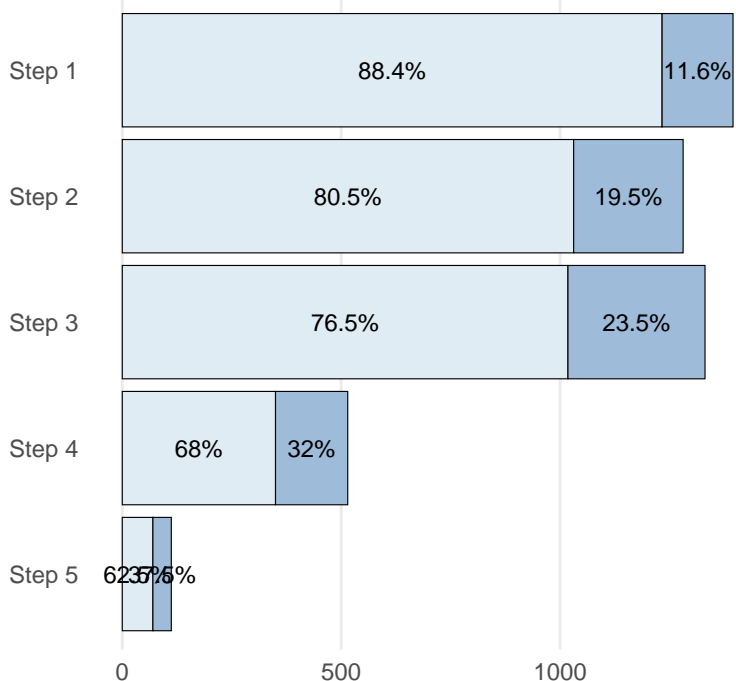

Number of Patients  
(Percent by Place of Asthma Care)

Place of Asthma Care Primary Care Specialist Care

GINA 2020 Step According to Age Group
